# Supplementary material for: Sustainable oleic and stearic acid based biodegradable surfactants
Source: Royal Society of Chemistry journal article supplement (doi:10.1039/c6ra27036k), 2017-01-01
Supplement: c6ra27036k1.pdf [file c6ra27036k1.pdf]

## SUPPLEMENTRY INFORMATION

### **Sustainable Oleic and Stearic Acid Based Biodegradable Surfactants**

Avinash Bhadani,<sup>\*a</sup> Kazuki Iwabata,<sup>a</sup> Kenichi Sakai,<sup>a</sup> Setsuko Koura,<sup>b</sup> Hideki Sakai<sup>a</sup>  
and Masahiko Abe<sup>\*a</sup>

<sup>a</sup>Department of Pure and Applied Chemistry in Faculty of Science and Technology  
and Research Institute for Science and Technology, Tokyo University of Science,  
2641 Yamazaki, Noda, Chiba 278-8510, Japan.

<sup>b</sup>Department of Applied Chemistry, Chiba Institute of Technology, 2-17-1,  
Tsudanuma, Narashino, Chiba, 275-8588, Japan.

\*Corresponding author: [abhadani@rs.tus.ac.jp](mailto:abhadani@rs.tus.ac.jp) and [abemasa@rs.noda.tus.ac.jp](mailto:abemasa@rs.noda.tus.ac.jp)

## Table of Contents

1. Characterization data (Page 3)
2. **Figure S1:**  $^1\text{H}$  NMR spectra of 2-bromoethyl 2-bromoacetate (Page 4).
3. **Figure S2:**  $^{13}\text{C}$  NMR spectra of 2-bromoethyl 2-bromoacetate (Page 4).
4. **Figure S3:**  $^1\text{H}$  NMR spectra of 2-(2-bromoethoxy)-2-oxoethyl oleate (Page 5).
5. **Figure S4:**  $^{13}\text{C}$  NMR spectra of 2-(2-bromoethoxy)-2-oxoethyl oleate (Page 5).
6. **Figure S5:**  $^1\text{H}$  NMR spectra of 2-(2-bromoethoxy)-2-oxoethyl stearate (Page 6).
7. **Figure S6:**  $^{13}\text{C}$  NMR spectra of 2-(2-bromoethoxy)-2-oxoethyl stearate (Page 6).
8. **Figure S7:**  $^1\text{H}$  NMR spectra of 1-methyl-3-(2-(2-(oleoyloxy)acetoxy)ethyl)-1*H*-imidazol-3-ium bromide (Page 7).
9. **Figure S8:**  $^{13}\text{C}$  NMR spectra of 1-methyl-3-(2-(2-(oleoyloxy)acetoxy)ethyl)-1*H*-imidazol-3-ium bromide (Page 7).
10. **Figure S9:**  $^1\text{H}$  NMR spectra of 1-methyl-3-(2-(2-(stearoyloxy)acetoxy)ethyl)-1*H*-imidazol-3-ium bromide (Page 8).
11. **Figure S10:**  $^{13}\text{C}$  NMR spectra of 1-methyl-3-(2-(2-(stearoyloxy)acetoxy)ethyl)-1*H*-imidazol-3-ium bromide (Page 8).

**2-bromoethyl 2-bromoacetate.** Transparent liquid, yield 63.4%.  $^1\text{H}$  NMR (500 MHz,  $\text{CDCl}_3$ ) 4.48 (m, 2 H,  $\text{COOCH}_2\text{CH}_2$ ), 3.88 (s, 2 H,  $\text{COOCH}_2\text{Br}$ ), 3.54 (t,  $J = 3.70$ , 2 H,  $\text{CH}_2\text{Br}$ ).  $^{13}\text{C}$  NMR (126 MHz,  $\text{CDCl}_3$ ) 166.49, 64.99, 28.01, 25.42.

**2-(2-bromoethoxy)-2-oxoethyl oleate.** Yellowish viscous liquid, yield 82.2%.  $^1\text{H}$  NMR (500 MHz,  $\text{CDCl}_3$ ) 5.34 (m, 2 H,  $\text{CH}=\text{CH}$ ), 4.65 (m, 2 H,  $\text{COOCH}_2\text{COO}$ ), 4.47 (t,  $J = 6.1$ , 2 H,  $\text{COOCH}_2$ ), 3.51 (t,  $J = 6.1$ , 2 H,  $\text{BrCH}_2$ ), 2.42 (t,  $J = 7.5$ , 2 H,  $\text{CH}_2\text{COO}$ ), 2.01 (m, 4 H,  $\text{CH}_2\text{CH}=\text{CHCH}_2$ ), 1.65 (m, 2 H,  $\text{CH}_2\text{CH}_2\text{COO}$ ), 1.30-1.26 (m, 20 H,  $10\times\text{CH}_2$ ), 0.88 (t,  $J = 6.8$ , 3 H,  $\text{CH}_3$ ).  $^{13}\text{C}$  NMR (126 MHz,  $\text{CDCl}_3$ ) 172.61, 167.13, 129.61, 129.37, 64.11, 60.01, 33.38, 31.63, 29.48, 29.40, 29.26, 29.05, 28.87, 28.79, 28.73, 27.87, 26.91, 26.87, 24.49, 22.40, 13.82.

**2-(2-bromoethoxy)-2-oxoethyl stearate.** White waxy solid, yield 83.4%.  $^1\text{H}$  NMR (500 MHz,  $\text{CDCl}_3$ ) 4.65 (s, 2 H,  $\text{COOCH}_2\text{COO}$ ), 4.47 (t,  $J = 6.1$ , 2 H,  $\text{COOCH}_2$ ), 3.51 (dd,  $J = 6.1$ , 2 H), 2.42 (2 H, t,  $J = 7.5$ ), 1.66 (2 H, m), 1.25 (28 H, s), 0.88 (3 H, t,  $J = 6.6$ ).  $^{13}\text{C}$  NMR (126 MHz,  $\text{CDCl}_3$ ) 172.83, 167.31, 64.24, 60.15, 33.57, 31.80, 29.57, 29.48, 29.32, 29.24, 29.12, 28.90, 27.91, 24.64, 22.56, 13.96.

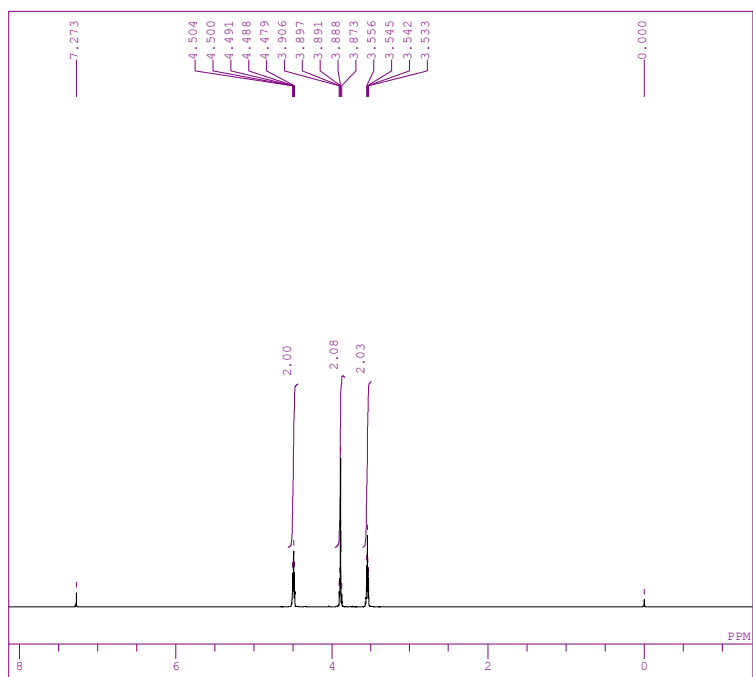

**Figure S1:**  $^1\text{H}$  NMR spectra of 2-bromoethyl 2-bromoacetate.

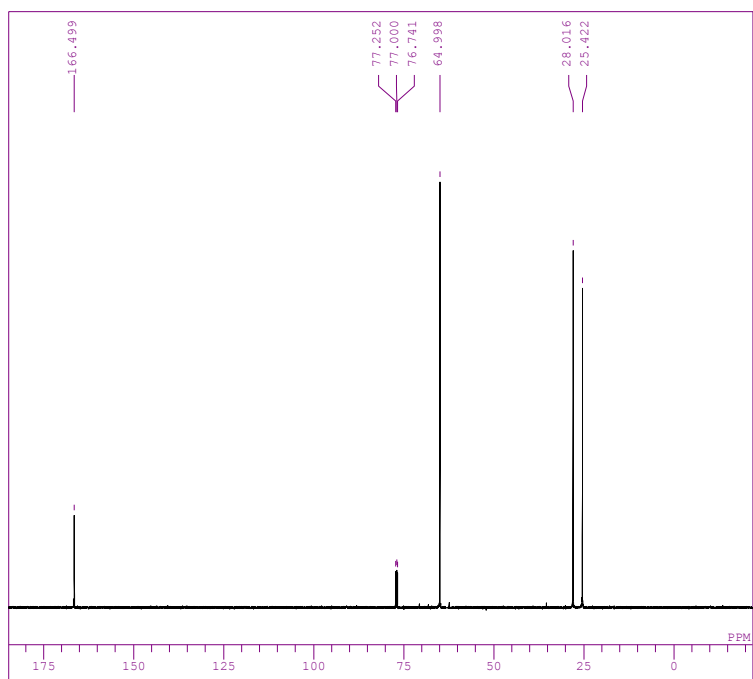

**Figure S2:**  $^{13}\text{C}$  NMR spectra of 2-bromoethyl 2-bromoacetate.

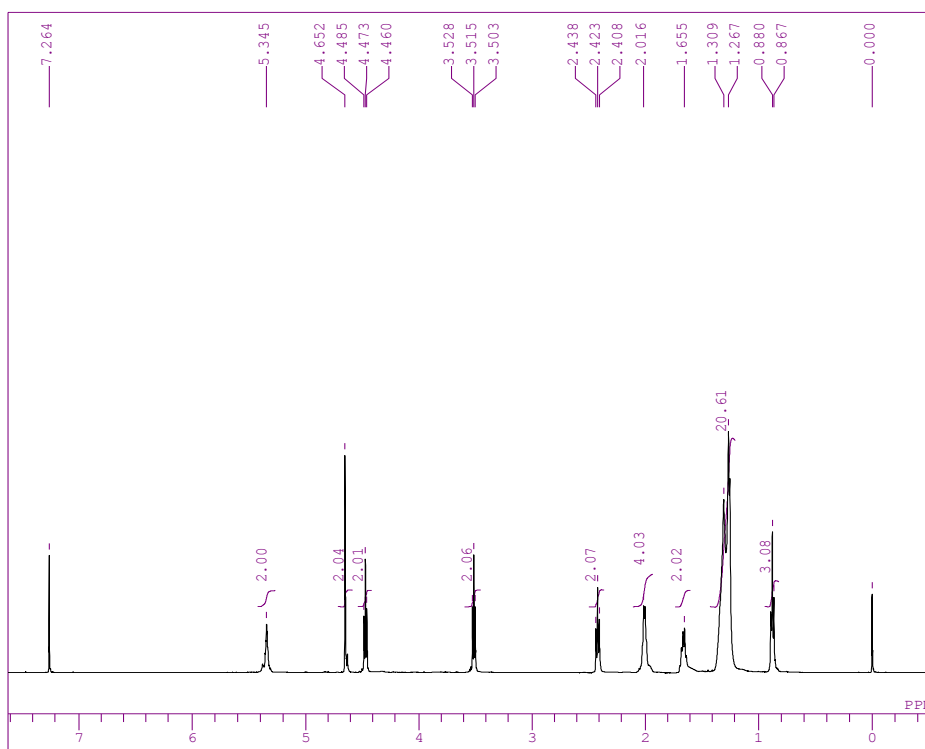

**Figure S3:**  $^1\text{H}$  NMR spectra of 2-(2-bromoethoxy)-2-oxoethyl oleate.

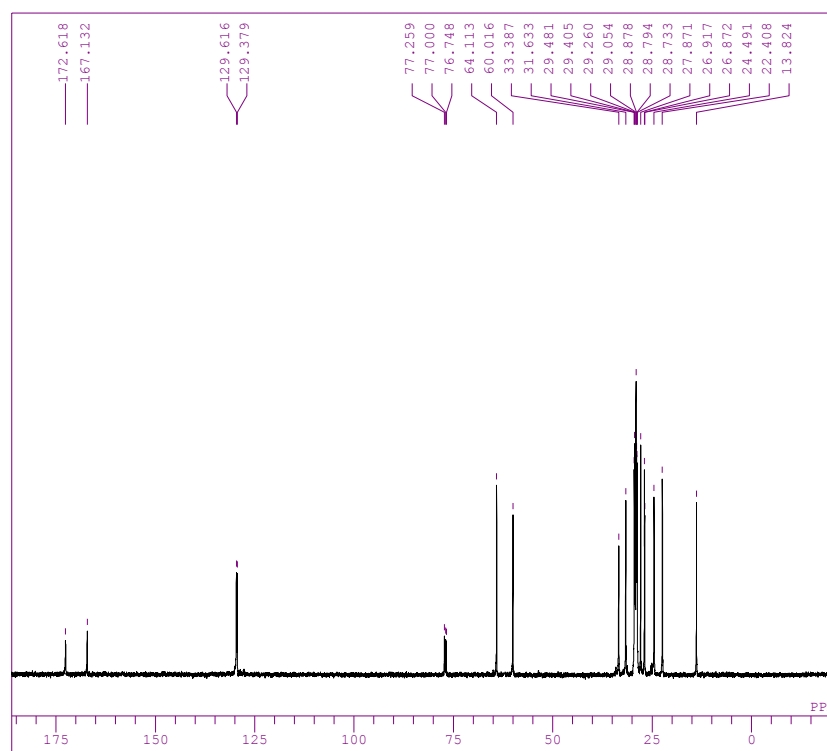

**Figure S4:**  $^{13}\text{C}$  NMR spectra of 2-(2-bromoethoxy)-2-oxoethyl oleate.

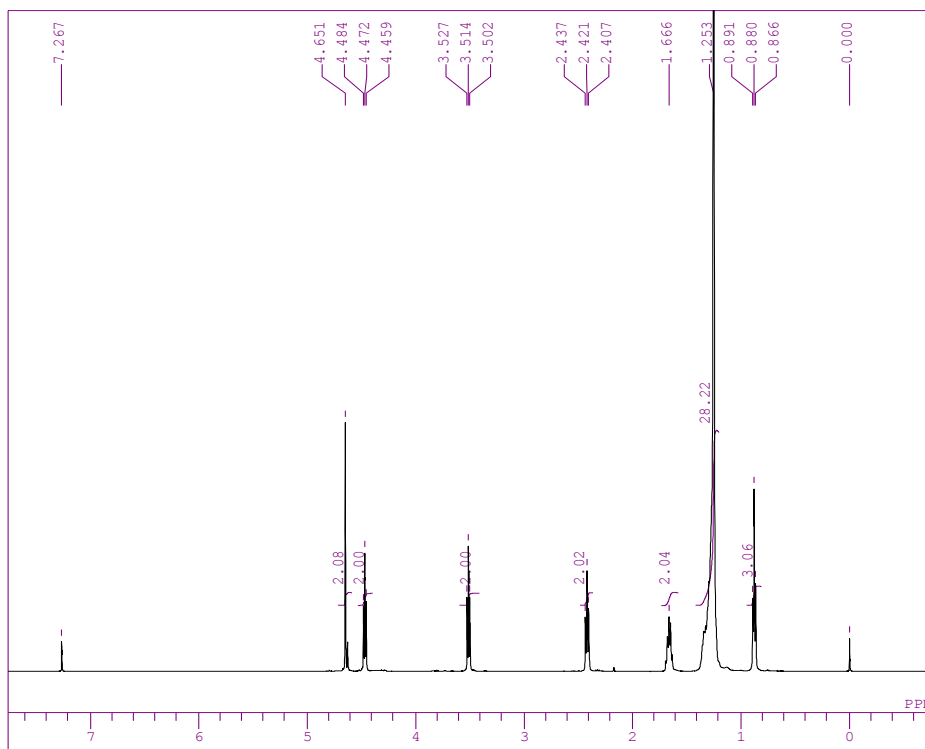

**Figure S5:**  $^1\text{H}$  NMR spectra of 2-(2-bromoethoxy)-2-oxoethyl stearate.

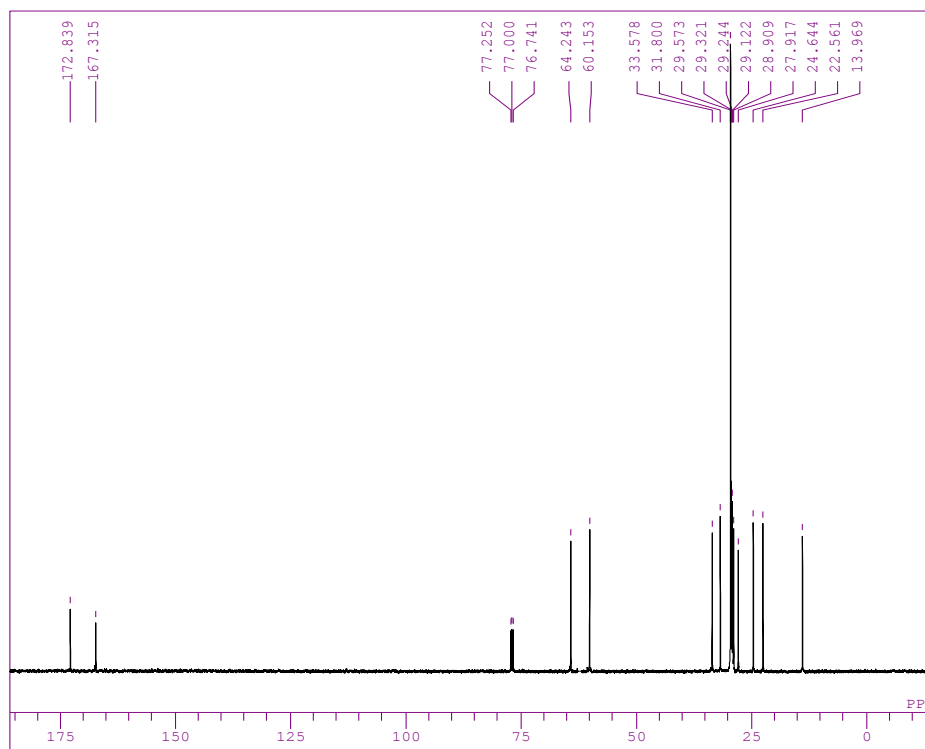

**Figure S6:**  $^{13}\text{C}$  NMR spectra of 2-(2-bromoethoxy)-2-oxoethyl stearate.

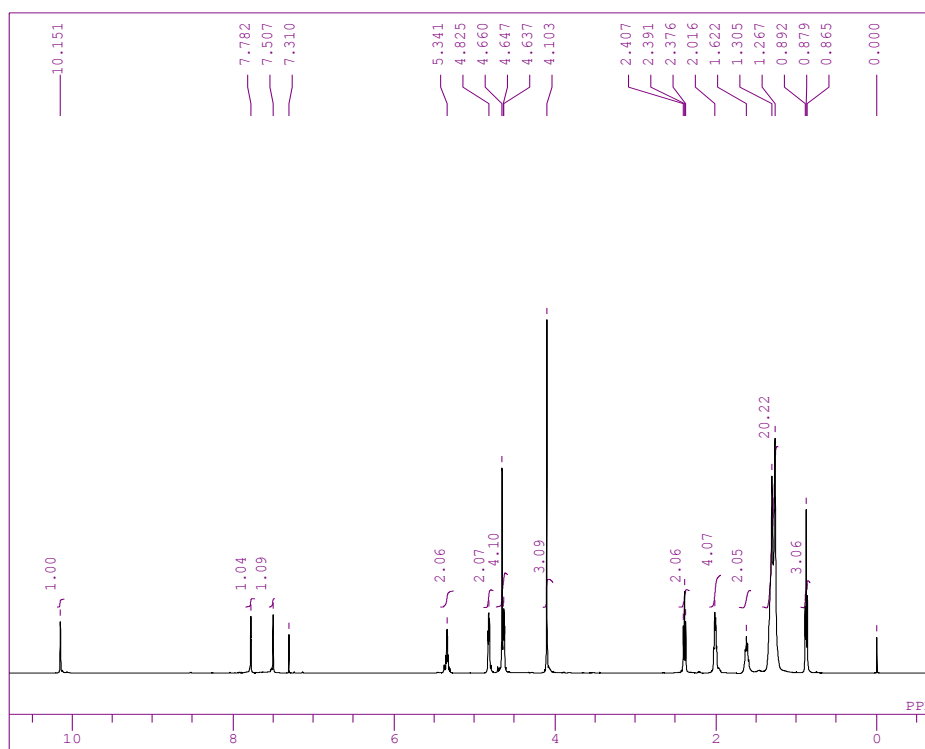

**Figure S7:**  $^1\text{H}$  NMR spectra of 1-methyl-3-(2-(2-(oleoyloxy)acetoxy)ethyl)-1H-imidazol-3-ium bromide.

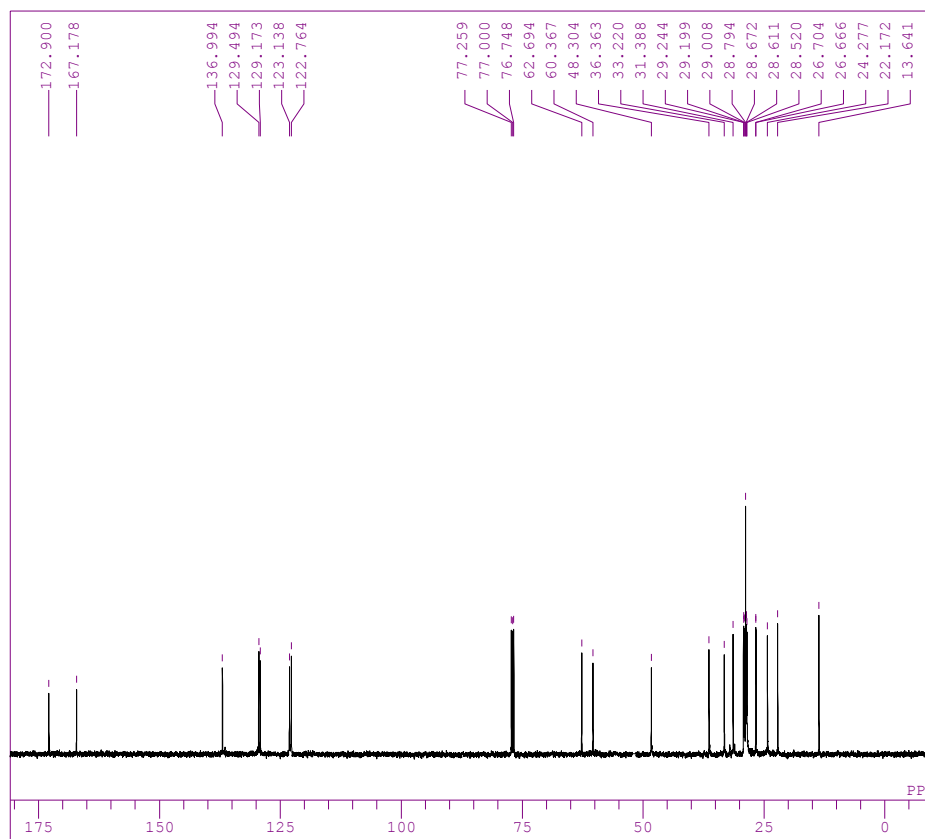

**Figure S8:**  $^{13}\text{C}$  NMR spectra of 1-methyl-3-(2-(2-(oleoyloxy)acetoxy)ethyl)-1H-imidazol-3-ium bromide.

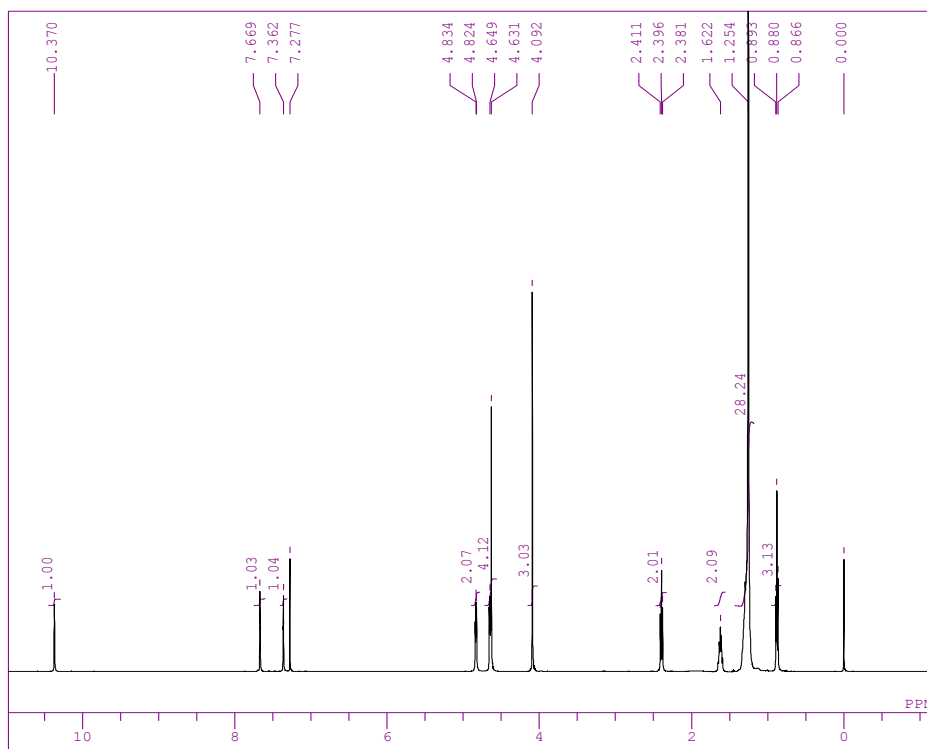

**Figure S9:**  $^1\text{H}$  NMR spectra of 1-methyl-3-(2-(2-(stearoyloxy)acetoxy)ethyl)-1*H*-imidazol-3-ium bromide.

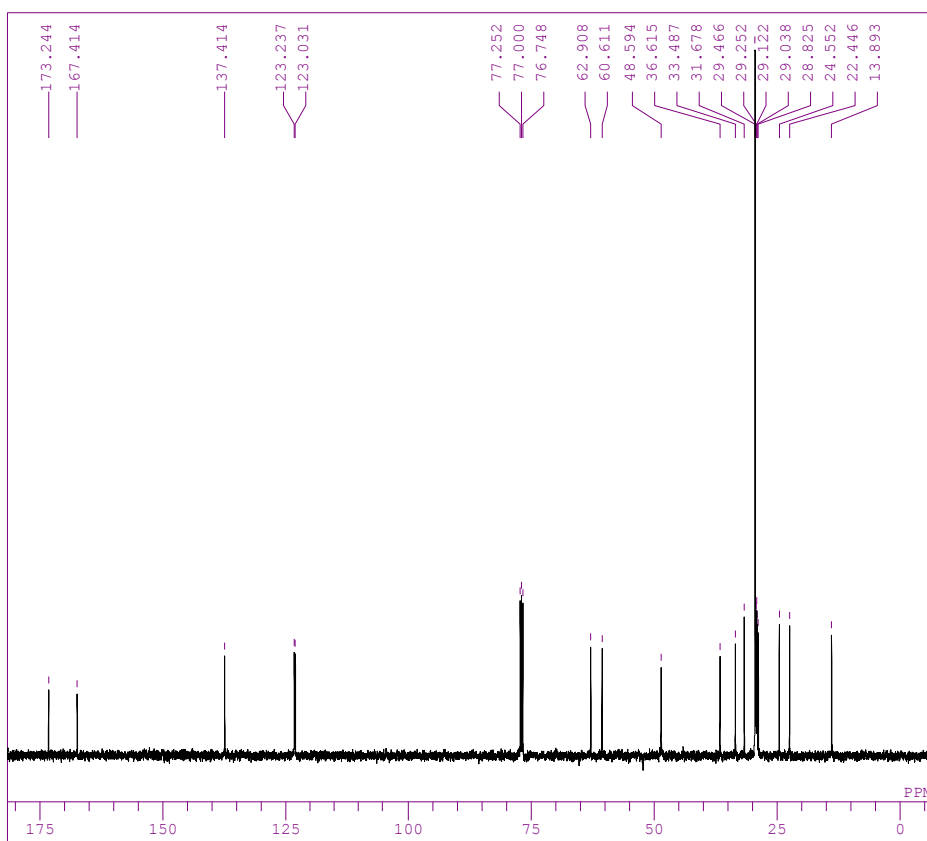

**Figure S10:**  $^{13}\text{C}$  NMR spectra of 1-methyl-3-(2-(2-(stearoyloxy)acetoxy)ethyl)-1*H*-imidazol-3-ium bromide.
